# Supplementary material for: Density functional theoretical investigation on structure, optical response and hydrogen adsorption properties of B9/metal–B9 clusters
Source: Royal Society of Chemistry journal article supplement (doi:10.1039/c3cp50881a), 2013-01-01
Supplement: c3cp50881a.pdf [file c3cp50881a.pdf]

## Supporting Information

# Structural, optical and hydrogen adsorption properties of $B_9$ /metal- $B_9$ clusters: A Density Functional Theoretical Study

Swastika Banerjee,<sup>[a]</sup> Ganga Periyasamy<sup>[b]</sup> and Swapan K. Pati<sup>\*[a,b]</sup>

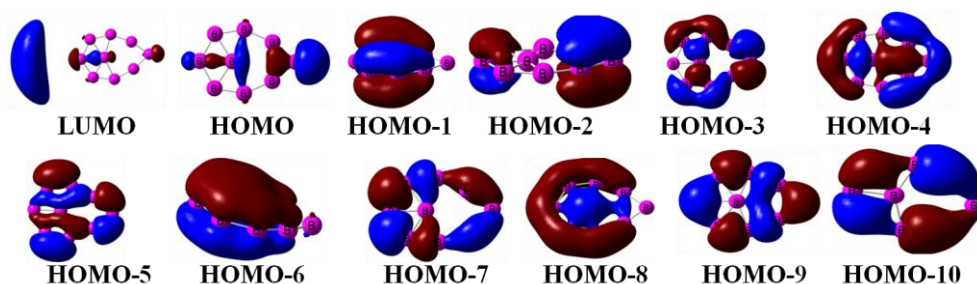

Figure S1 Molecular Orbital representations, involved in delocalization and structural framework for  $B_9^{3-}$  conformer-A, are given.

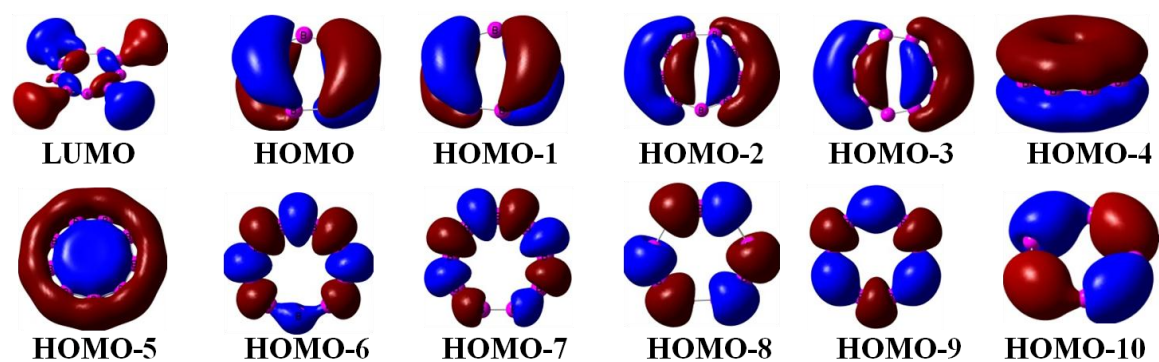

Figure S2 Molecular Orbital representations, involved in delocalization and structural framework for  $B_9^{3-}$  conformer-C are given.

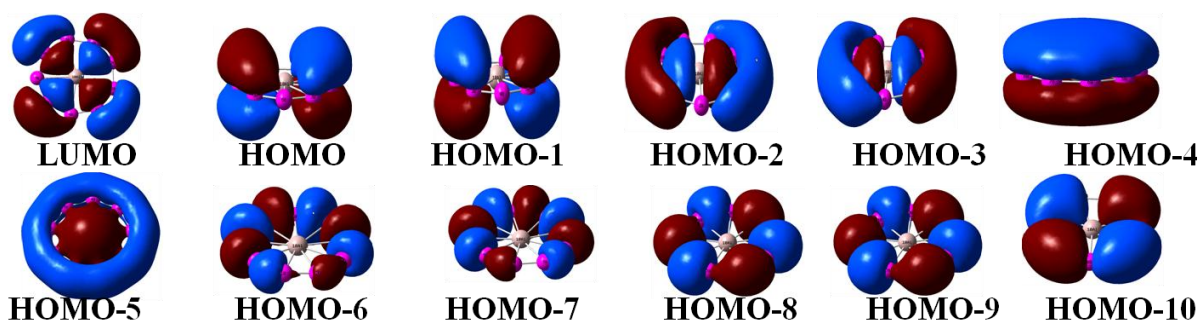

Figure S3 Molecular Orbital representations, involved in delocalization and structural framework for GM@ $B_9$  are given.
